# Supplementary material for: ALG-2 couples T cell activation and apoptosis by regulating proteasome activity and influencing MCL1 stability
Source: PubMed Central journal article supplement (PMC6952393; doi:10.1038/s41419-019-2199-4), 2020-01-02
Supplement: 41419_2019_2199_MOESM2_ESM.pdf [file 41419_2019_2199_MOESM2_ESM.pdf]

Table S1 Peptides identified in the LC-MS/MS study (GST-Rpn3 VS. GST)

| prot_acc      | prot_desc                                                     | prot_mass    | pep_score    | pep_expect      | pep_seq                            |
|---------------|---------------------------------------------------------------|--------------|--------------|-----------------|------------------------------------|
| O43242        | 26S proteasome non-ATPase regulatory subunit 3 GN=PSMD3       | 61054        | 139.82       | 1.80E-13        | SVFPEQANNNEWAR                     |
| P68363        | Tubulin alpha-1B chain GN=TUBA1B                              | 50804        | 137.35       | 1.00E-13        | TIGGGDDSFNTFFSETGAGK               |
| O43242        | 26S proteasome non-ATPase regulatory subunit 3 GN=PSMD3       | 61054        | 99.4         | 1.9E-09         | AIQLEYSEAR                         |
| P0DMV8        | Heat shock 70 kDa protein 1A GN=HSPA1A                        | 70294        | 94.68        | 5.10E-09        | IINEPTAAAIAIYGLDR                  |
| P68032        | Actin, alpha cardiac muscle 1 GN=ACTC1                        | 42334        | 93.88        | 7.10E-09        | SYELPDGQVITIGNER                   |
| Q562R1        | Beta-actin-like protein 2 GN=ACTBL2                           | 42318        | 93.88        | 7.10E-09        | SYELPDGQVITIGNER                   |
| P10809        | 60 kDa heat shock protein, mitochondrial GN=HSPD1             | 61187        | 93.34        | 1.40E-09        | TALLDAAGVASLLTTAEVVVTEIPK          |
| P68371        | Tubulin beta-4B chain GN=TUBB4B                               | 50255        | 89.07        | 2.00E-08        | GHYTEGAELVDSVLDVVR                 |
| P61019        | Ras-related protein Rab-2A GN=RAB2A                           | 23702        | 78.09        | 2.80E-07        | TASNVEEAFINTAK                     |
| Q9H0D6        | 5~-3~ exoribonuclease 2 GN=XRN2                               | 109426       | 75.45        | 4.20E-07        | AALEEVYPLDTPETR                    |
| <b>O75340</b> | <b>Programmed cell death protein 6 GN=PDCD6</b>               | <b>21912</b> | <b>72.37</b> | <b>6.90E-07</b> | <b>DNSGMIDKNELK</b>                |
| P62979        | Ubiquitin-40S ribosomal protein S27a GN=RPS27A                | 18296        | 70.44        | 7.90E-07        | ESTLHLVLR                          |
| <b>O75340</b> | <b>Programmed cell death protein 6 GN=PDCD6</b>               | <b>21912</b> | <b>66.67</b> | <b>1.60E-06</b> | <b>SGVISDTELQQALSNGTWTFPNPVTVR</b> |
| P46439        | Glutathione S-transferase Mu 5 GN=GSTM5                       | 25829        | 62.54        | 8.20E-06        | ITQSNAILR                          |
| Q96DA2        | Ras-related protein Rab-39B GN=RAB39B                         | 24835        | 54.91        | 5.90E-05        | LQIWDTAGQER                        |
| P62847        | 40S ribosomal protein S24 GN=RPS24                            | 15413        | 51.4         | 0.00011         | TTPDVIVFVGFGR                      |
| O00487        | 26S proteasome non-ATPase regulatory subunit 14 GN=PSMD14     | 34726        | 47.87        | 5.70E-05        | AVAVVVDPIQSVK                      |
| Q16643        | Drebrin GN=DBN1 PE=1 SV=4                                     | 71842        | 47.09        | 0.00021         | LELLAAYEEVIR                       |
| Q9NVI7        | ATPase family AAA domain-containing protein 3A GN=ATAD3A      | 71610        | 46.29        | 0.0003          | ITVLEALR                           |
| Q9Y399        | 28S ribosomal protein S2, mitochondrial GN=MRPS2              | 33513        | 43.54        | 0.00049         | LLFGPTVR                           |
| Q9BWT3        | Poly(A) polymerase gamma GN=PAPOLG                            | 83093        | 42.94        | 0.00092         | LRSLDIR                            |
| Q93008        | Probable ubiquitin carboxyl-terminal hydrolase FAF-X GN=USP9X | 295515       | 39.72        | 0.0018          | LAQQISDEASR                        |
| Q6Q0C0        | E3 ubiquitin-protein ligase TRAF7 GN=TRAF7                    | 76386        | 37.88        | 0.0049          | IWDIR                              |
| Q16186        | Proteasomal ubiquitin receptor ADRM1 GN=ADRM1                 | 42412        | 34.04        | 0.0043          | YLVEFR                             |
| P17980        | 26S protease regulatory subunit 6A GN=PSMC3                   | 49458        | 32.68        | 0.0031          | VDILDPELLR                         |
| Q96J02        | E3 ubiquitin-protein ligase Itchy homolog GN=ITCH             | 103593       | 32.09        | 0.0068          | IYYVDHFTR                          |
| Q96L21        | 60S ribosomal protein L10-like GN=RPL10L                      | 24959        | 30.72        | 0.014           | IFDLGR                             |
| P62191        | 26S protease regulatory subunit 4 GN=PSMC1                    | 49325        | 30.16        | 0.0039          | IETLDPALIRPGR                      |
| P35998        | 26S protease regulatory subunit 7 GN=PSMC2                    | 49002        | 28.05        | 0.017           | FELLAR                             |
| O00308        | NEDD4-like E3 ubiquitin-protein ligase WWP2 GN=WWP2           | 99420        | 26.76        | 0.013           | NYEQWQSQR                          |
| Q5XPI4        | E3 ubiquitin-protein ligase RNF123 GN=RNF123                  | 149960       | 23.68        | 0.014           | LTIAILR                            |
| O95714        | E3 ubiquitin-protein ligase HERC2 GN=HERC2                    | 533510       | 20.93        | 0.034           | VVVDLLK                            |
| P0C646        | Olfactory receptor 52Z1 GN=OR52Z1 PE=3 SV=1                   | 33827        | 20.67        | 0.035           | IGIAAVVR                           |
| Q96DA2        | Ras-related protein Rab-39B GN=RAB39B                         | 24835        | 6.49         | 4               | LAAAYGMKYIETSAR                    |
| Q16186        | Proteasomal ubiquitin receptor ADRM1 GN=ADRM1                 | 42412        | 5.29         | 5.1             | AGKMSLK                            |
| O95714        | E3 ubiquitin-protein ligase HERC2 GN=HERC2                    | 533510       | 3.55         | 4.2             | KSSRPAGKGVGLAR                     |
